# Supplementary material
Source: Springer Nature journal article supplement (https://www.springermedizin.de/resource/supplementary/13063_2008_301_MOESM3_ESM.pdf/9617942)

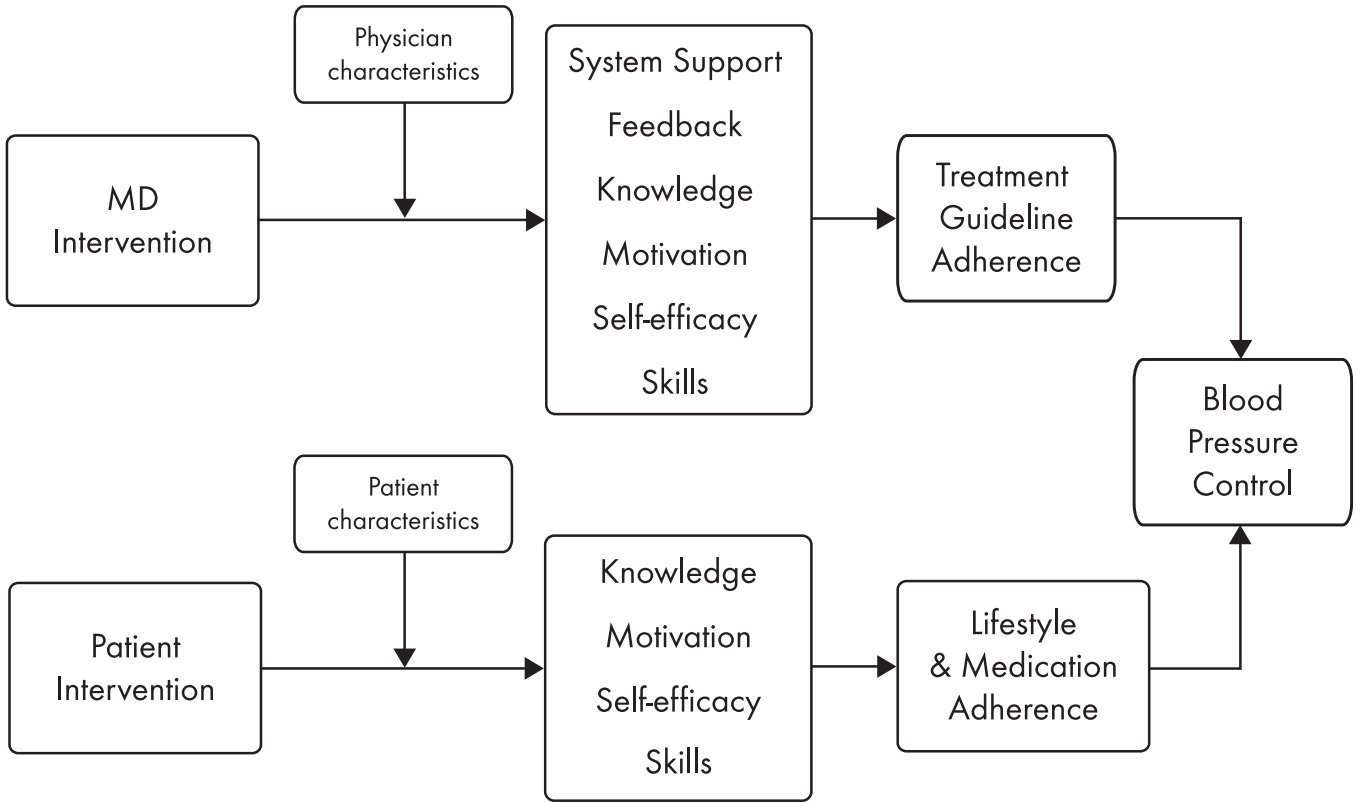

Supplement: MOESM3 [file 9617942]
